# Supplementary material for: Do the Lactotripeptides Isoleucine–Proline–Proline and Valine–Proline–Proline Reduce Systolic Blood Pressure in European Subjects? A Meta-Analysis of Randomized Controlled Trials
Source: PubMed Central journal article supplement — Am J Hypertens. 2013 Jan 7;26(3):442–9. doi: 10.1093/ajh/hps044 (PMC3565599; doi:10.1093/ajh/hps044), 2013-01-07
Supplement: supp_hps044_SDEC_Table_3__EDIT_THIS_TABLE.pdf [file supp_hps044_SDEC_Table_3__EDIT_THIS_TABLE.pdf]

**PRODUCTION EDITOR: This table in its present form cannot be edited in Word. It must be converted to an editable Word document in order to be edited.**

**SDC Table 3** | Baseline values of systolic and diastolic blood pressure in studies included in the meta-analysis[AQ20]

The gray lines correspond to studies in which isolated systolic hypertension (SBP > 140 mm Hg and DBP < 90 mmHg) can be suspected.

| nb | Reference                             | BP status | baseline values in Control (C) and Intervention (I) groups<br>(mmHg; mean± SEM or SD) |                                                      |
|----|---------------------------------------|-----------|---------------------------------------------------------------------------------------|------------------------------------------------------|
|    |                                       |           | SBP                                                                                   | DBP                                                  |
| 1  | Seppo et al. (2002)                   | HT        | C:148± 5<br>I: 148 ± 4                                                                | C:94 ± 2/<br>I: 93 ± 1                               |
| 2  | Seppo et al. Am J Clin Nutr (2003)    | HT        | C:152 ± 13 (range 133-176)/<br>I: 155 ±13 (range 137-176)                             | C:97 ± 6 (range 86-108)/<br>I: 96 ± 6 (range 88-108) |
| 3  | Tuomilehto et al. (2004)              | HT        | C:156,6 C11,4<br>I: 152,7 ± 10,0                                                      | C: 98.1 ± 7.2<br>I: 98.1 ± 7.0                       |
| 4  | Engberink et al. Hypertension (2008)  | PHT & HT  | C: 140,7 ± 4,3 I: 141,6 ± 2,4<br>SE values on 1 of 3 I sub-groups (see paper)         | C: 83.9 ± 1.3<br>I: 85.6± 1.9                        |
| 5  | van der Zander et al. (2008b)         | PHT & HT  | whole population: 148.5 ± 5.9                                                         | whole population: 89.3 ± 6.9                         |
| 6  | van der Zander et al. (2008a)         | HT        | C: 150 ± 12,9<br>I: 150 ± 12,8                                                        | C: 85.2 ± 9.2<br>I: 86.2 ± 9.3                       |
| 7  | van Mierlo et al. (2009)              | HT        | 147.4 ± 9.0<br>(all subjects- dose A)                                                 | 89.0 ± 5.9<br>(all subjects- dose A)                 |
|    |                                       |           | 144.9 ± 8.3<br>(all subjects- dose B)                                                 | 87.0 ± 6.4<br>(all subjects- dose B)                 |
| 8  | de Leeuw et al. Blood Pressure (2009) | HT        | C: 148 ± 13                                                                           | C: 85 ± 9                                            |
|    |                                       |           | I: 147 ± 12                                                                           | I: 85 ± 7                                            |
|    |                                       |           | C: 148 ± 13                                                                           | C: 85 ± 9                                            |
|    |                                       |           | I: 146 ± 14                                                                           | I: 85 ± 10                                           |
|    |                                       |           | C: 148 ± 13                                                                           | C: 85 ± 9                                            |
|    |                                       |           | I: 149 ± 15                                                                           | I: 85 ± 8                                            |
| 9  | Turpeinen at al. (2009)               | HT        | C:138,1 ± 11,2<br>I: 139,1 ± 12,4                                                     | C: 86 ± 9<br>I: 87 ± 7                               |
| 10 | Usinger et al. (2010)                 | PHT & HT  | C:136,0 ± 8,8<br>I: 145,0 ± 10,9                                                      | C: 89.4 ± 7.6<br>I: 92.6 ± 6.4                       |
|    |                                       |           | C:136,0 ± 8,8<br>I: 145,6 ± 1,7                                                       | C: 89.4 ± 7.6<br>I: 93.4 ± 6.8                       |
| 11 | Cicero et al. J Med. Food 2010        | NT        | C: 118,3 ± 9,6<br>I: 120,1 ± 7,6                                                      | C: 75.8 ± 4.4<br>I: 74.2 ± 6.5                       |
|    |                                       | PHT       | C: 137,0 ± 7,6<br>I: 138,5 ± 8,2                                                      | C: 86.5 ± 6.2<br>I: 86.6 ± 7.2                       |
| 12 | Cicero 2011                           | NT/PHT    | C: 132.7 ± 12.5<br>I: 133.5 ± 12.9                                                    | C: 82.8 ± 8.3<br>I: 83.3± 8.7                        |
| 13 | Cicero et al., 2012                   | PHT & HT  | C:132,69 ± 12,46<br>I: 133,49 ± 12,92                                                 | C: 82.78 ± 78.33<br>I: 83.28 ± 8.75                  |
| 14 | Turpeinen et al., 2012                | HT        | C:156 ± 14<br>I: 155 ± 14                                                             | C: 98 ± 9<br>I: 95 ± 7                               |

BP, blood pressure; C, control group; DBP, diastolic blood pressure; HT, hypertension; I, intervention group; PHT, prehypertension; SBP, systolic blood pressure
